# Supplementary material for: Hierarchical microsphere MOF arrays with ultralow Ir doping for efficient hydrogen evolution coupled with hydrazine oxidation in seawater
Source: Royal Society of Chemistry journal article supplement (doi:10.1039/d1ta07328a), 2021-01-01
Supplement: d1ta07328a1.pdf [file d1ta07328a1.pdf]

## **Hierarchical Microsphere MOF Arrays with Ultralow Ir Doping for Efficient Hydrogen Evolution Coupled with Hydrazine Oxidation in Seawater**

Xuejun Zhai <sup>a,c</sup>, Qingping Yu <sup>a,d</sup>, Guishan Liu <sup>a,c</sup>, Junlu Bi <sup>a,d</sup>, Yu Zhang <sup>a,d</sup>, Jingqi Chi <sup>a,b\*</sup>, Jianping Lai <sup>a,d</sup>, Bo Yang <sup>c</sup>, Lei Wang <sup>a,c,d\*</sup>

<sup>a</sup> Key Laboratory of Eco-chemical Engineering, Key Laboratory of Optic-electric Sensing and Analytical Chemistry of Life Science, Taishan Scholar Advantage and Characteristic Discipline Team of Eco Chemical Process and Technology, Qingdao University of Science and Technology, Qingdao 266042, PR China.

<sup>b</sup> College of Chemical Engineering, Qingdao University of Science and Technology, Qingdao 266042, PR China.

<sup>c</sup> College of Environment and Safety Engineering, Qingdao University of Science and Technology, Qingdao 266042, PR China.

<sup>d</sup> College of Chemistry and Molecular Engineering, Qingdao University of Science and Technology, Qingdao 266042, PR China.

\*E-mail: [chijingqi@qust.edu.cn](mailto:chijingqi@qust.edu.cn); [inorchemwl@126.com](mailto:inorchemwl@126.com)

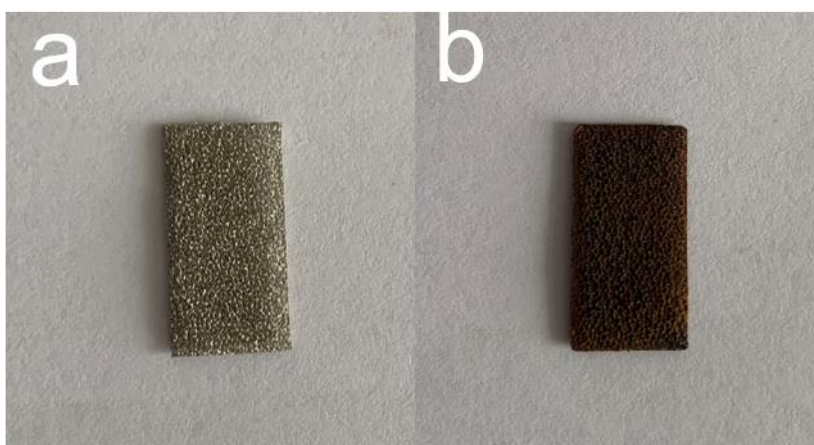

**Fig. S1** Photos of (a) NF and (b) MIL-(IrNiFe)@NF.

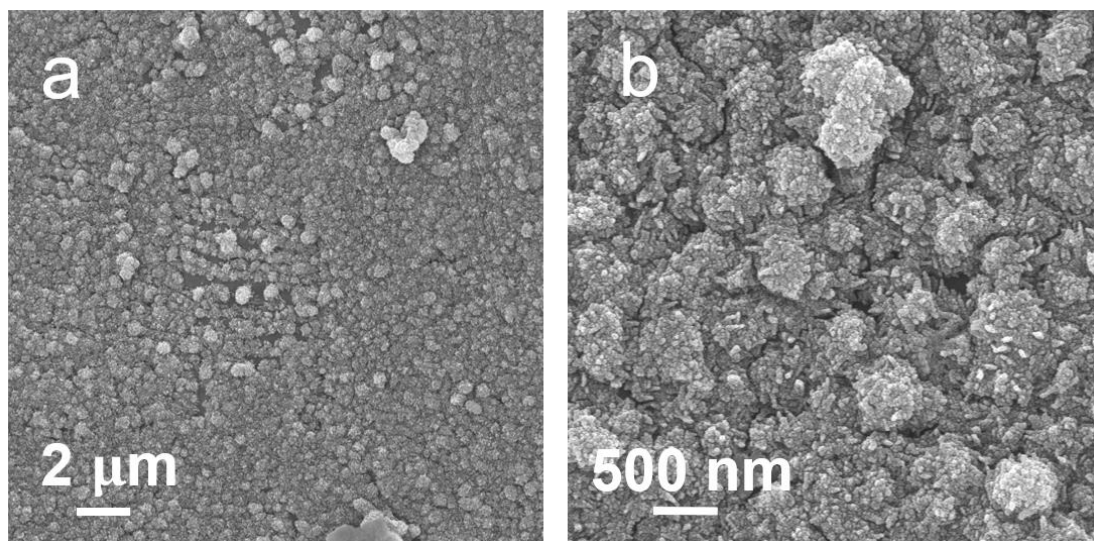

**Fig. S2** (a, b) SEM images of MIL-(NiFe)@NF.

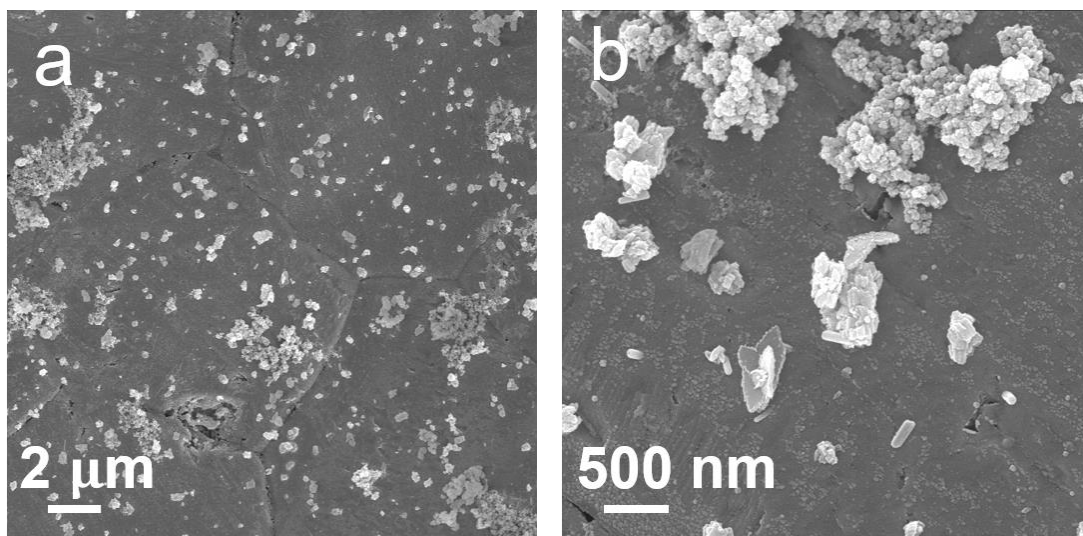

**Fig. S3** (a, b) SEM images of MIL-(Fe)@NF.

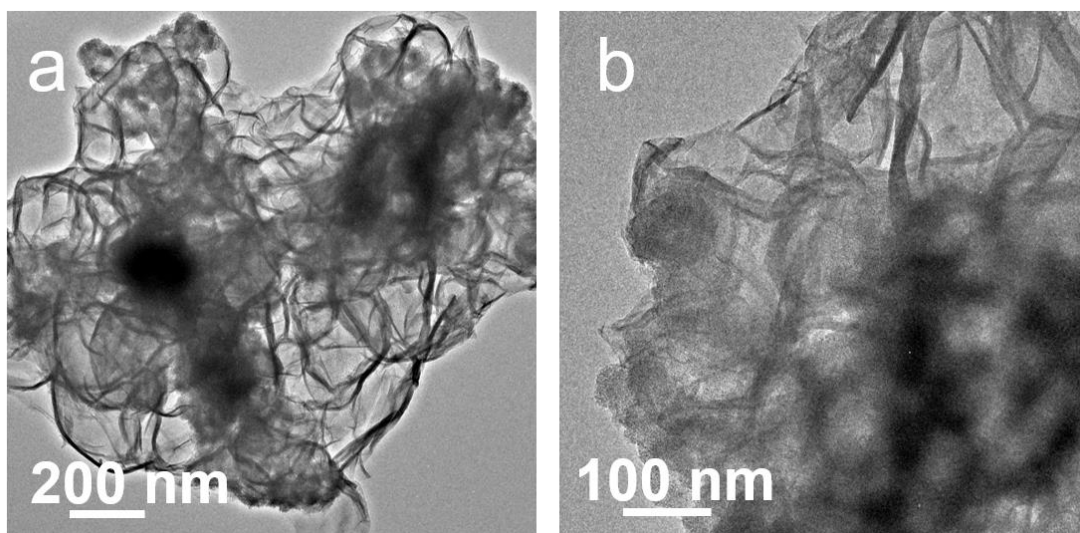

**Fig. S4** (a, b) TEM image of MIL-(NiFe)@NF.

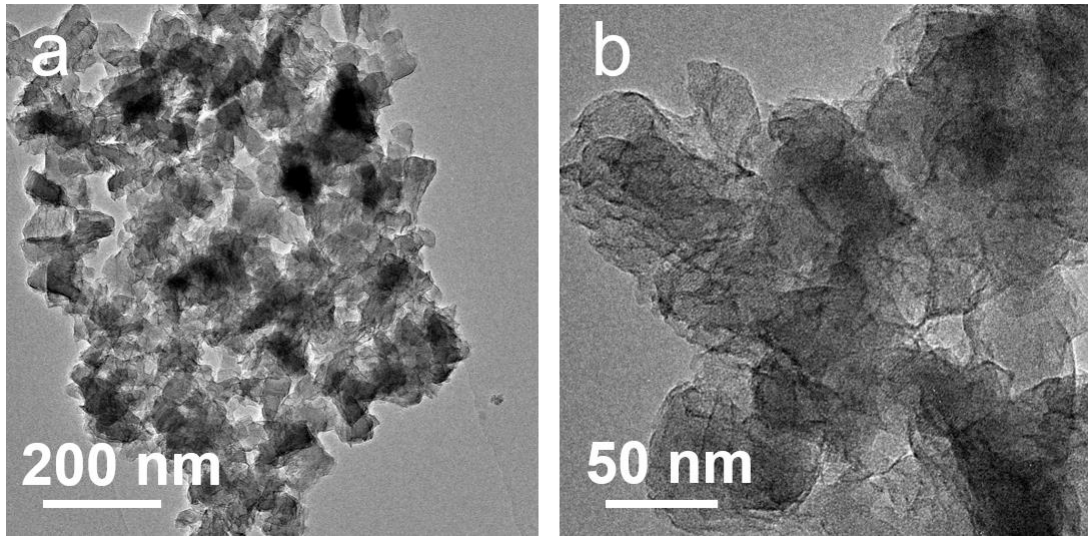

**Fig. S5** (a, b) TEM images of MIL-(Fe)@NF.

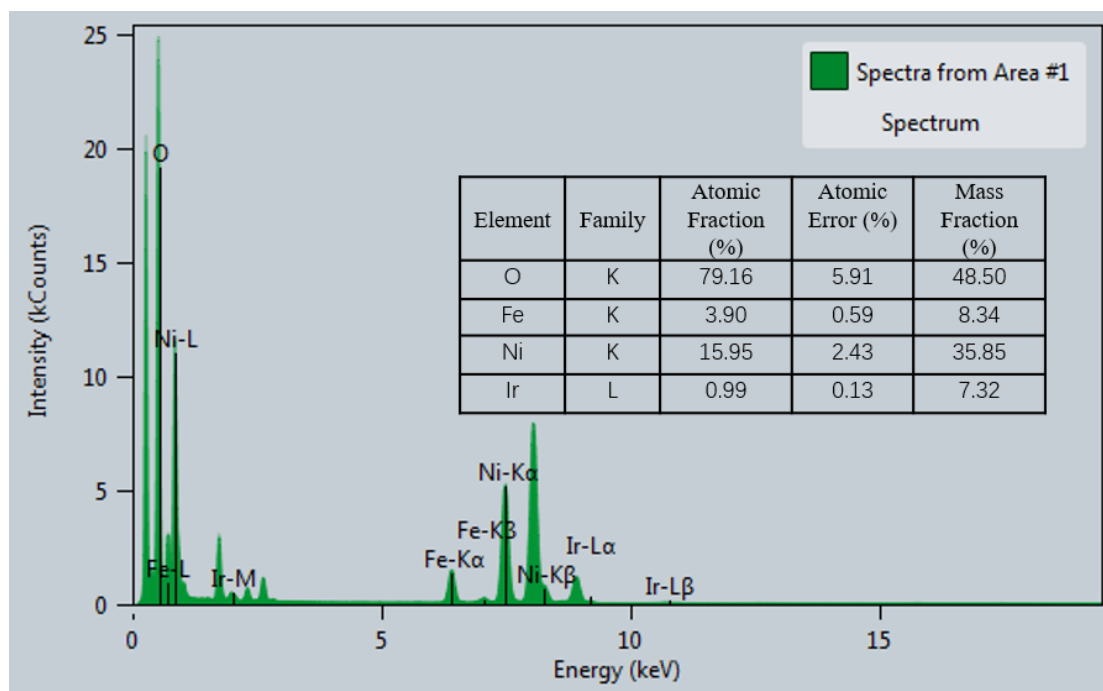

**Fig. S6** EDX of MIL-(IrNiFe)@NF catalyst.

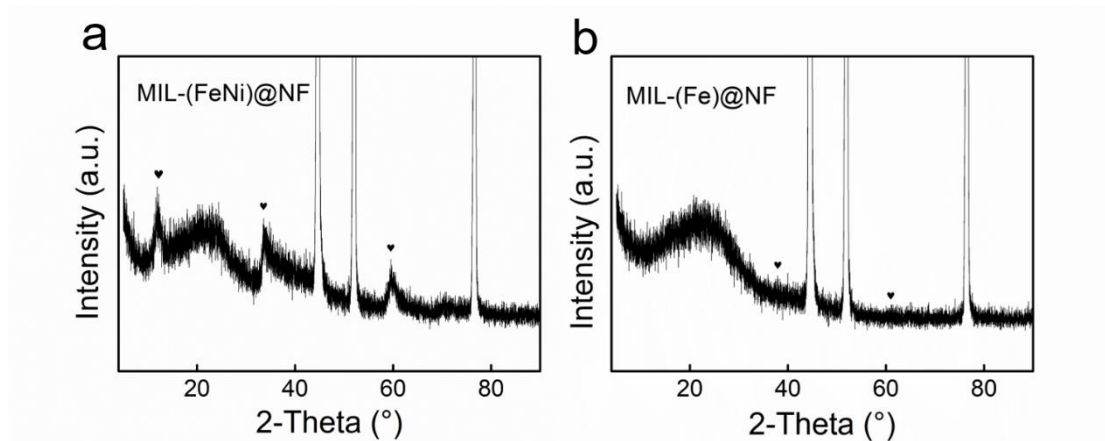

**Fig. S7** XRD patterns of (a)MIL-(NiFe)@NF and (b) MIL-(Fe)@NF.



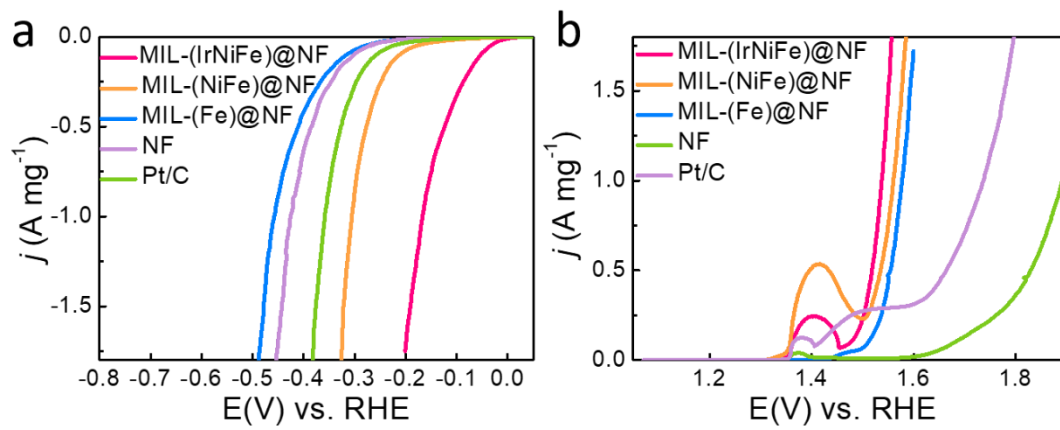

**Fig. S8** Mass specific activity of (a) HER and (b) OER.

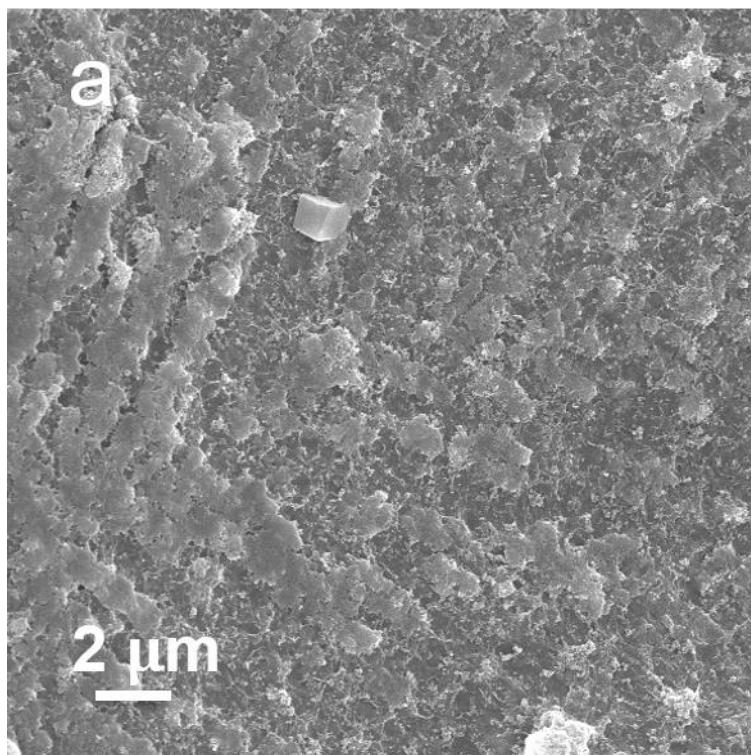

**Fig. S9** SEM image of MIL-(IrNiFe)@NF after stability test for OER.

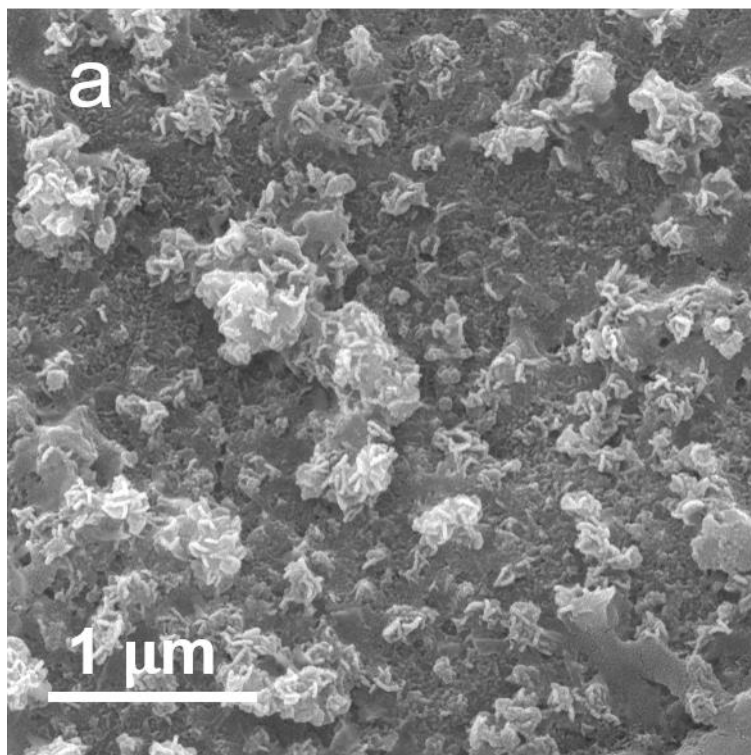

**Fig. S10** SEM image of MIL-(IrNiFe)@NF after stability test for HER.

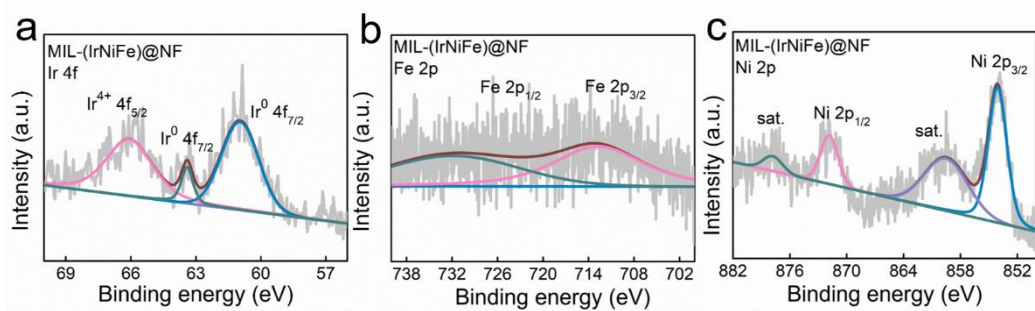

**Fig. S11** (a) Ir 4f spectra, (b) Fe 2p spectra, and (c) Ni 2p spectra of MIL-(IrNiFe)@NF after stability test for HER.

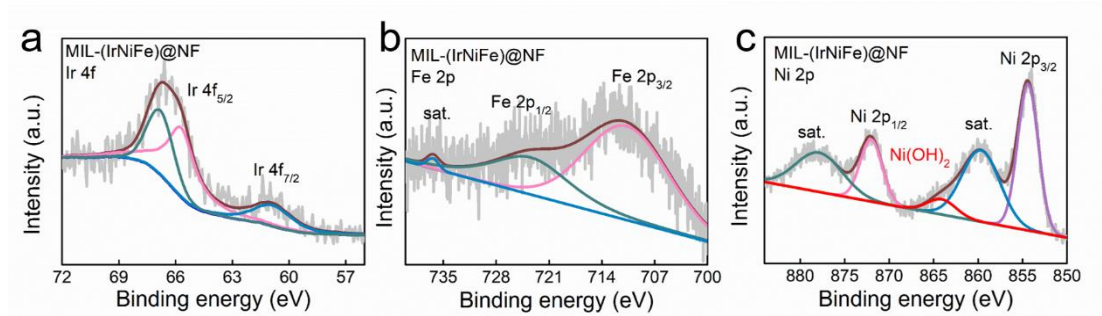

**Fig. S12** (a) Ir 4f spectra, (b) Fe 2p spectra, and (c) Ni 2p spectra of MIL-(IrNiFe)@NF after stability test for HzOR.

**Table S1. Comparison of HER activity between MIL-(IrNiFe)@NF and recently reported MOF-based electrocatalysts in a wide pH range.**

| Electrocatalysts                                          | $j$<br>(mA cm <sup>-2</sup> ) | $\eta$<br>(mV) | Electrolyte<br>solution | Refs.     |
|-----------------------------------------------------------|-------------------------------|----------------|-------------------------|-----------|
| MIL-(IrNiFe)@NF                                           | 10                            | 12             | 1.0 M KOH               | This work |
| MIL-53(Ru-NiFe)@NF                                        | 10                            | 27             | 1.0 M KOH               | 1         |
| NiFe-MOF/NF                                               | 10                            | 134            | 1.0 M KOH               | 2         |
| NFN-MOF/NF                                                | 10                            | 87             | 1.0 M KOH               | 3         |
| MNF-MOFs/NF                                               | 10                            | 79             | 1.0 M KOH               | 4         |
| NiFe/NiCo <sub>2</sub> O <sub>4</sub> /NF                 | 10                            | 270            | 1.0 M KOH               | 5         |
| S-NiFe <sub>2</sub> O <sub>4</sub> /NF                    | 10                            | 138            | 1.0 M KOH               | 6         |
| Ni <sub>3</sub> FeN/r-GO-NF                               | 10                            | 94             | 1.0 M KOH               | 7         |
| Ni-Co-P HNBS on<br>NF                                     | 10                            | 107            | 1.0 M KOH               | 8         |
| FeMnP/GNF                                                 | 10                            | 84             | 1.0 M KOH               | 9         |
| CoFePO@NF                                                 | 10                            | 87.5           | 1.0 M KOH               | 10        |
| MoS <sub>2</sub> -Ni <sub>3</sub> S <sub>2</sub> HNRs/ NF | 10                            | 98             | 1.0 M KOH               | 11        |
| FeSe <sub>2</sub> /NF                                     | 10                            | 178            | 1.0 M KOH               | 12        |
| FeB <sub>2</sub> -NF                                      | 10                            | 69             | 1.0 M KOH               | 13        |

**Table S2. Comparison of OER activity between MIL-(IrNiFe)@NF and recently reported MOF-based electrocatalysts in a wide pH range.**

| Electrocatalysts                                          | $j$<br>(mA cm <sup>-2</sup> ) | $\eta$<br>(mV) | Electrolyte<br>solution | Refs.     |
|-----------------------------------------------------------|-------------------------------|----------------|-------------------------|-----------|
| MIL-(IrNiFe)@NF                                           | 50                            | 230            | 1.0 M KOH               | This work |
| MIL-53(Ru-NiFe)@NF                                        | 50                            | 210            | 1.0 M KOH               | 1         |
| NiFe-MOF/NF                                               | 10                            | 240            | 1.0 M KOH               | 2         |
| NFN-MOF/NF                                                | 10                            | 240            | 1.0 M KOH               | 3         |
| MNF-MOFs/NF                                               | 50                            | 235            | 1.0 M KOH               | 4         |
| NiFe/NiCo <sub>2</sub> O <sub>4</sub> /NF                 | 60                            | 270            | 1.0 M KOH               | 5         |
| S-NiFe <sub>2</sub> O <sub>4</sub> /NF                    | 10                            | 267            | 1.0 M KOH               | 6         |
| Ni <sub>3</sub> FeN/r-GO-NF                               | 10                            | 270            | 1.0 M KOH               | 7         |
| Ni-Co-P HNBS on<br>NF                                     | 10                            | 270            | 1.0 M KOH               | 8         |
| FeMnP/GNF                                                 | 10                            | 280            | 1.0 M KOH               | 9         |
| CoFePO@NF                                                 | 10                            | 274.5          | 1.0 M KOH               | 10        |
| MoS <sub>2</sub> -Ni <sub>3</sub> S <sub>2</sub> HNRs/ NF | 10                            | 249            | 1.0 M KOH               | 11        |
| FeSe <sub>2</sub> /NF                                     | 10                            | 245            | 1.0 M KOH               | 12        |
| FeB <sub>2</sub> -NF                                      | 10                            | 296            | 1.0 M KOH               | 13        |

**Table S3. Comparison of overall water splitting solution performance of MIL-(IrFeNi)@NF and other recently reported electrocatalysts in alkaline seawater.**  $E_{10}$  and  $E_{100}$  are the working voltage at 10 mA cm<sup>-2</sup> and 100 mA cm<sup>-2</sup> in the two-electrode system.

| Electrocatalysts                                 | $E_{10}$<br>(V) | $E_{100}$<br>(V) | Electrolyte<br>solution                                        | Refs.        |
|--------------------------------------------------|-----------------|------------------|----------------------------------------------------------------|--------------|
| MIL-(IrFeNi)@NF                                  | 1.4             | 1.67             | 1.0 M KOH<br>+Seawater+ 0.5<br>M N <sub>2</sub> H <sub>4</sub> | This<br>work |
| Ni <sub>2</sub> P-Fe <sub>2</sub> P/NF           | 1.56            | 1.68             | 1.0 M KOH                                                      | 14           |
| S-(Ni,Fe)OOH                                     |                 | 1.66             | 1.0 M KOH +<br>Seawater                                        | 15           |
| Co-Se1//Co-Se4                                   | 1.8             |                  | 1.0 M KOH +<br>Seawater                                        | 16           |
| Ni <sub>3</sub> FeN@C/NF//Ni <sub>3</sub> N@C/NF |                 | 1.69             | 1.0 M KOH                                                      | 17           |



**Table S4. Comparison of overall water splitting coupled with HzOR of MIL-(IrFeNi)@NF and other recently reported electrocatalysts.**  $E_{10}$ ,  $E_{100}$ , and  $E_{500}$  are the working potential at 10, 100, and 500 mA cm<sup>-2</sup> in the two-electrode system.

| <b>Electrocatalysts</b>                                | $E_{10}$<br>(V) | $E_{100}$<br>(V) | $E_{500}$<br>(V) | <b>Electrolyte<br/>solution</b>                                | <b>Refs.</b> |
|--------------------------------------------------------|-----------------|------------------|------------------|----------------------------------------------------------------|--------------|
| MIL-(IrFeNi)@NF                                        | 0.03            | 0.15             | 0.39             | 1.0 M KOH<br>+Seawater+ 0.5<br>M N <sub>2</sub> H <sub>4</sub> | This<br>work |
| Mo-Ni <sub>3</sub> N/Ni/NF                             | 0.05            | 0.26             |                  | 1.0 M KOH +<br>0.1 M N <sub>2</sub> H <sub>4</sub>             | 18           |
| PW-Co <sub>3</sub> N NWA/NF                            | 0.028           |                  |                  | 1.0 M KOH +<br>0.1 M N <sub>2</sub> H <sub>4</sub>             | 19           |
| Fe <sub>2</sub> O <sub>3</sub> /ECP-15  FeP/<br>ECP-15 | 0.93            |                  |                  | 1.0 M KOH +<br>0.1 M N <sub>2</sub> H <sub>4</sub>             | 20           |
| Ni <sub>2</sub> P/NF                                   |                 |                  | 1.00             | 1.0 M KOH +<br>0.1 M N <sub>2</sub> H <sub>4</sub>             | 21           |

## References

- 1 M. Zhao, H. Li, W. Li, J. Li, L. Yi, W. Hu and C. M. Li, *Chem-Eur. J.*, 2020, **26**, 17091-17096.
- 2 J. Duan, S. Chen and C. Zhao, *Nat Commun*, 2017, **8**, 15341.
- 3 D. Senthil Raja, X.-F. Chuah and S.-Y. Lu, *Adv. Energy Mater.*, 2018, **8**, 1801065.
- 4 D. Senthil Raja, H.-W. Lin and S.-Y. Lu, *Nano Energy*, 2019, **57**, 1-13.
- 5 C. Xiao, Y. Li, X. Lu and C. Zhao, *Adv. Funct. Mater.*, 2016, **26**, 3515-3523.
- 6 J. Liu, D. Zhu, T. Ling, A. Vasileff and S.-Z. Qiao, *Nano Energy*, 2017, **40**, 264-273.
- 7 Y. Gu, S. Chen, J. Ren, Y. A. Jia, C. Chen, S. Komarneni, D. Yang and X. Yao, *ACS Nano*, 2018, **12**, 245-253.
- 8 E. Hu, Y. Feng, J. Nai, D. Zhao, Y. Hu and X. W. Lou, *Energy Environ. Sci.*, 2018, **11**, 872-880.
- 9 Z. Zhao, D. E. Schipper, A. P. Leitner, H. Thirumalai, J.-H. Chen, L. Xie, F. Qin, M. K. Alam, L. C. Grabow, S. Chen, D. Wang, Z. Ren, Z. Wang, K. H. Whitmire and J. Bao, *Nano Energy*, 2017, **39**, 444-453.
- 10 J. Duan, S. Chen, A. Vasileff and S. Z. Qiao, *ACS Nano*, 2016, **10**, 8738-8745.
- 11 Y. Yang, K. Zhang, H. Lin, X. Li, H. C. Chan, L. Yang and Q. Gao, *ACS Catal.*, 2017, **7**, 2357-2366.
- 12 C. Panda, P. W. Menezes, C. Walter, S. Yao, M. E. Miehlich, V. Gutkin, K. Meyer

- and M. Driess, *Angew. Chem. Int. Ed.*, 2017, **56**, 10506-10510.
- 13 H. Li, P. Wen, Q. Li, C. Dun, J. Xing, C. Lu, S. Adhikari, L. Jiang, D. L. Carroll and S. M. Geyer, *Adv. Energy Mater.*, 2017, **7**, 1700513.
14. L. Wu, L. Yu, F. Zhang, B. McElhenny, D. Luo, A. Karim, S. Chen and Z. Ren, *Adv. Funct. Mater*, 2020, **31**, 2006484.
15. L. Yu, L. Wu, B. McElhenny, S. Song, D. Luo, F. Zhang, Y. Yu, S. Chen and Z. Ren, *Energy Environ. Sci.*, 2020, **13**, 3439-3446.
16. Y. Zhao, B. Jin, Y. Zheng, H. Jin, Y. Jiao and S. Z. Qiao, *Adv. Energy Mater*, 2019, 1901333.
17. B. Wang, M. Lu, D. Chen, Q. Zhang, W. Wang, Y. Kang, Z. Fang, G. Pang and S. Feng, *J. Mater. Chem. A*, 2021, **9**, 13562-13569.
18. Y. Liu, J. Zhang, Y. Li, Q. Qian, Z. Li and G. Zhang, *Adv. Funct. Mater.*, 2021, **31**, 2103673.
19. Y. Liu, J. Zhang, Y. Li, Q. Qian, Z. Li, Y. Zhu and G. Zhang, *Nat. Commun.*, 2020, **11**, 1853.
20. Y. Wang, Z. Chen, H. Wu, F. Xiao, E. Cao, S. Du, Y. Wu and Z. Ren, *ACS Sustain. Chem. Eng.*, 2018, **6**, 15727-15736.
21. C. Tang, R. Zhang, W. Lu, Z. Wang, D. Liu, S. Hao, G. Du, A. M. Asiri and X. Sun, *Angew. Chem. Int. Ed.*, 2017, **56**, 842-846.
